# Supplementary material
Source: publisher figshare collection journal article supplement (https://acs.figshare.com/ndownloader/files/3608907)
Supplement: Supplementary file 1 [file 3608907]

# First Principles Investigation of the TiO<sub>2</sub>/Organohalide Perovskites Interface: The Role of Interfacial Chlorine

Edoardo Mosconi,<sup>a,\*</sup> Enrico Ronca,<sup>a,b</sup> Filippo De Angelis<sup>a,\*</sup>

<sup>a</sup>Computational Laboratory for Hybrid/Organic Photovoltaics (CLHYO), CNR-ISTM, Via Elce di  
Sotto 8, I-06123, Perugia, Italy

<sup>b</sup> *Department of Chemistry, Biochemistry and Biotechnologies, University of Perugia, Via Elce di  
Sotto 8, I-06123, Perugia, Italy.*

\*E-mail: [edoardo@thch.unipg.it](mailto:edoardo@thch.unipg.it), [filippo@thch.unipg.it](mailto:filippo@thch.unipg.it)

## SUPPORTING INFORMATION

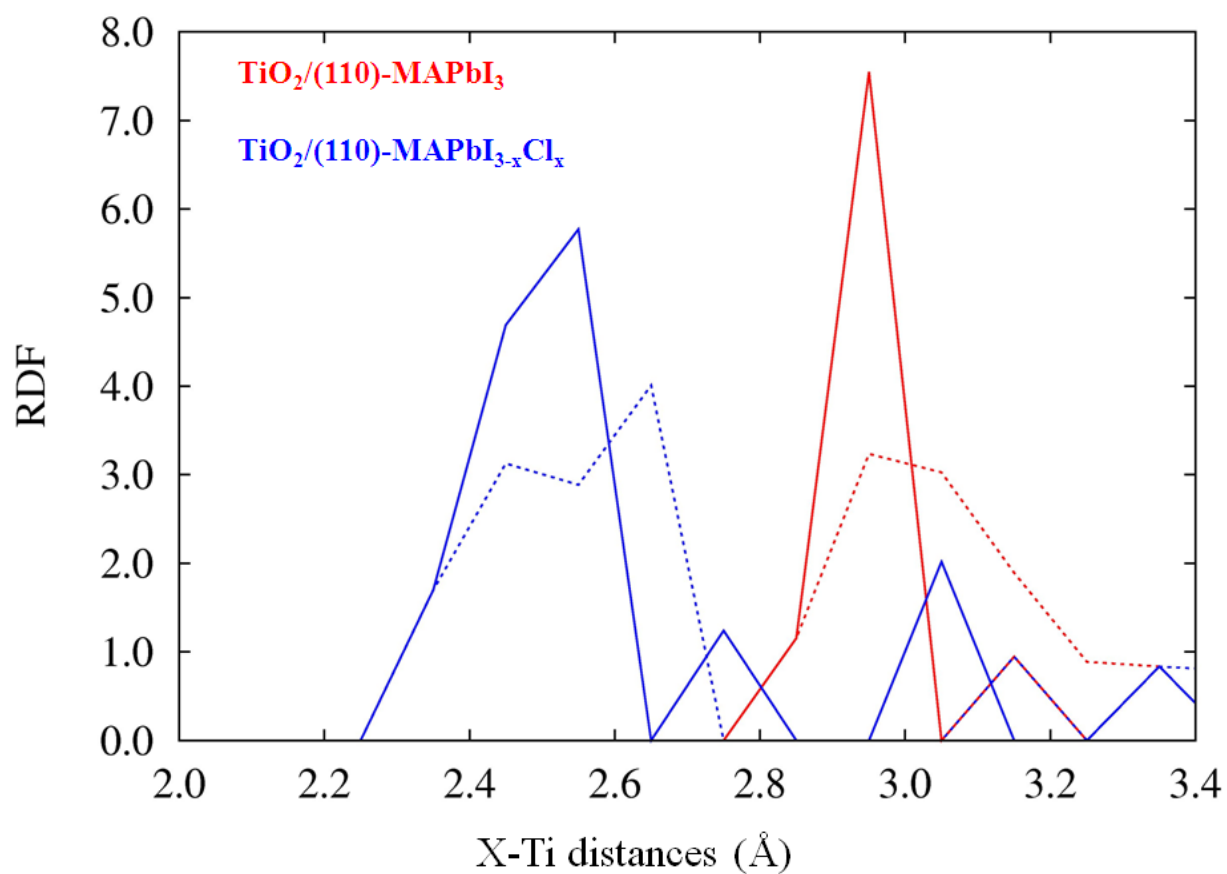

**Figure S1.** X-Ti (X=I or Cl) radial distribution functions (RDF) for the TiO<sub>2</sub>/MAPbI<sub>3</sub> (red) and TiO<sub>2</sub>/MAPbI<sub>3-x</sub>Cl<sub>x</sub> (blue) interfaces. Solid and dashed lines correspond to the (110) and (001) surfaces, respectively.

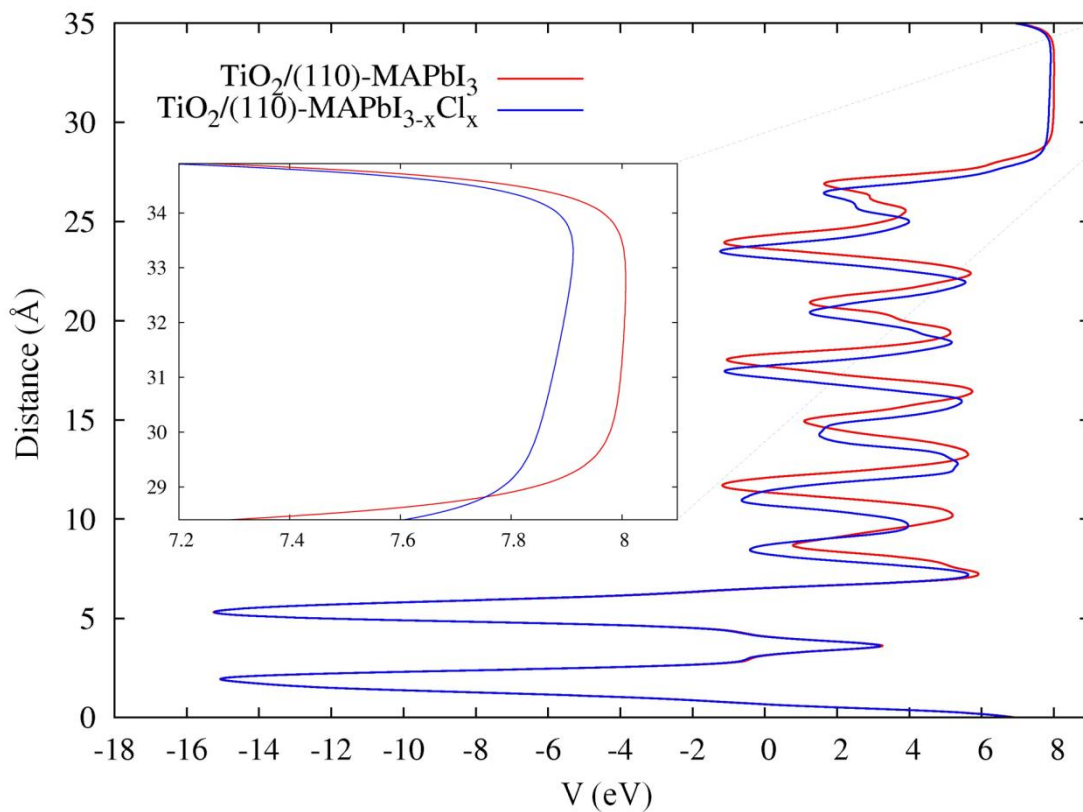

**Figure S2.** Integrated electrostatic potential along the direction normal to the  $\text{TiO}_2$  surface. The inset shows a zoom of the vacuum region, where a bending of the electrostatic potential is calculated for the  $\text{MAPbI}_{3-x}\text{Cl}_x$  perovskite, as opposed to the almost flat potential calculated for  $\text{MAPbI}_3$ .
